# Supplementary material for: Computational Analysis of Triazole-Based Kojic Acid Analogs as Tyrosinase Inhibitors by Molecular Dynamics and Free Energy Calculations
Source: MDPI journal article supplement (doi:10.3390/molecules27238141), 2022-11-23
Supplement: s1 [file s1]

# Computational Analysis of Triazole-based Kojic Acid Analogs as Tyrosinase Inhibitors by Molecular Dynamics and Free Energy Calculations

Lucas Sousa Martins, Reinaldo W. A. Gonçalves, Joana J. S. Moraes, Cláudio Nahum Alves and José Rogério A. Silva

## Supplementary Materials

**Figure S1.** Regression plot between MOLDOCK scoring (Kcal/mol) and IC<sub>50</sub> (μM) for all TYR systems.

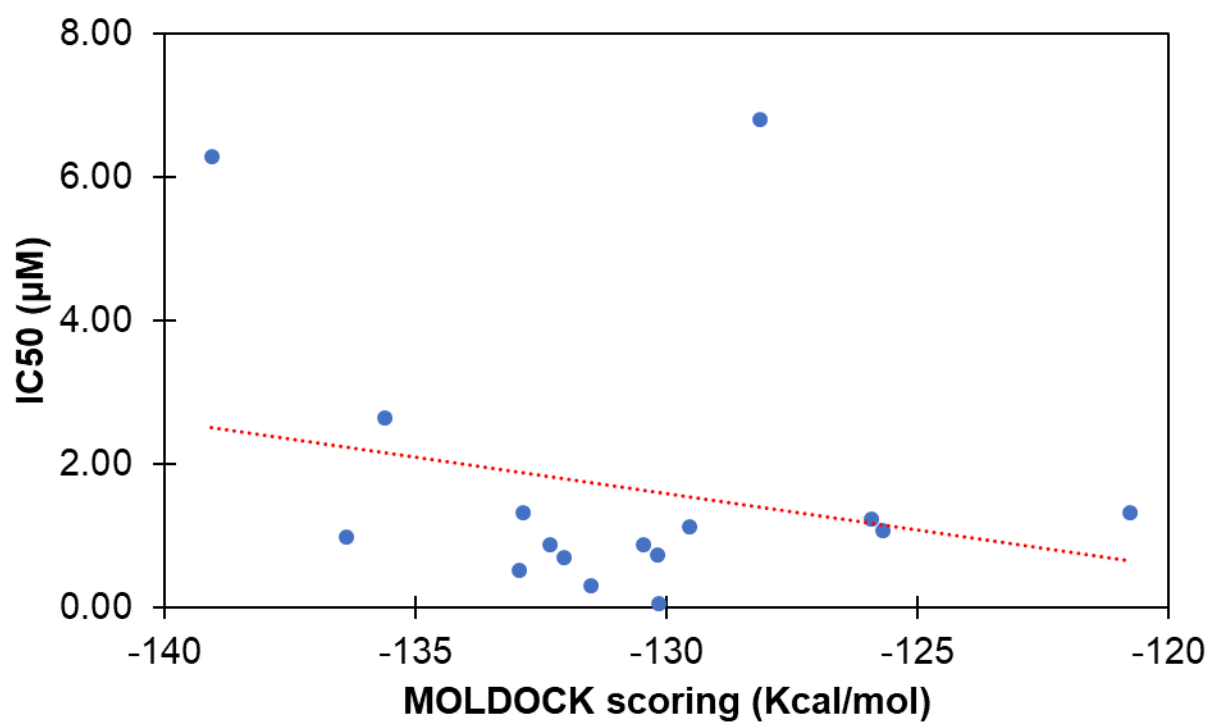

**Figure S2.** Plot of MD time (ps) versus RMSD (Å) for all TYR systems.

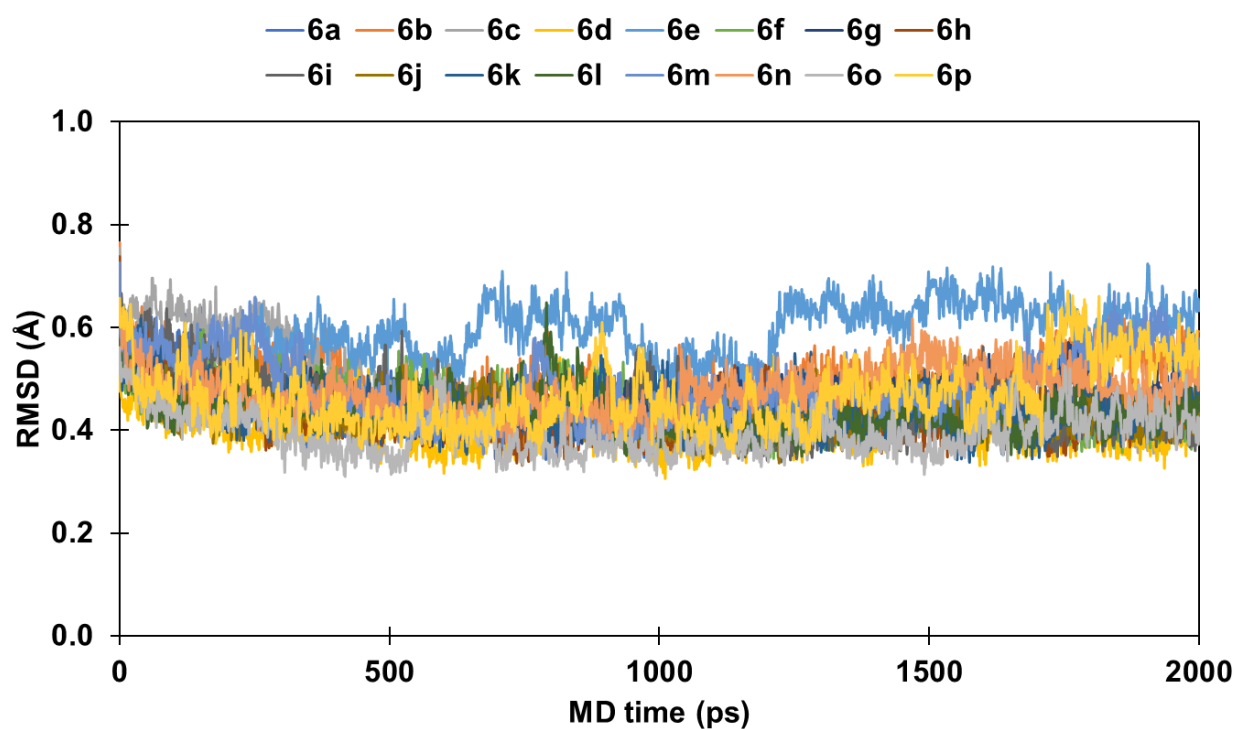

**Table S1.** LIE empirical parameters used for TYR systems.

| Inhibitor | $\alpha$ | $\beta$ | $\gamma$ |
|-----------|----------|---------|----------|
| 6a        | 0.18     | 0.37    | 17.33    |
| 6b        | 0.18     | 0.37    | 17.33    |
| 6c        | 0.18     | 0.37    | 17.33    |
| 6e        | 0.18     | 0.37    | 17.33    |
| 6f        | 0.18     | 0.37    | 17.33    |
| 6h        | 0.18     | 0.33    | 17.33    |
| 6i        | 0.18     | 0.37    | 17.33    |
| 6j        | 0.18     | 0.35    | 17.33    |
| 6l        | 0.18     | 0.37    | 17.33    |
| 6m        | 0.18     | 0.37    | 17.33    |
| 6n        | 0.18     | 0.37    | 17.33    |
| 6o        | 0.18     | 0.37    | 17.33    |
| 6p        | 0.18     | 0.37    | 17.33    |

**Table S2.** vdW interactions (in Kcal/mol) computed for all TYR systems.

| Residue       | 6a    | 6b    | 6c    | 6e    | 6f    | 6h    | 6i    | 6j    | 6l    | 6m    | 6n    | 6o     | 6p     |
|---------------|-------|-------|-------|-------|-------|-------|-------|-------|-------|-------|-------|--------|--------|
| <b>Phe197</b> | -1.97 | -1.98 | -2.43 | -2.1  | -1.32 | -3.13 | -4.19 | -3.79 | -3.38 | -3.02 | -2.99 | -2.34  | -2.72  |
| <b>Gly200</b> | -1.14 | -0.53 | -0.8  | -1.28 | -0.43 | -1.78 | -2.05 | -2.33 | -1.47 | -1.77 | -1.49 | -1.62  | -1.93  |
| <b>Pro201</b> | -3.06 | -2.25 | -2.92 | -3.48 | -1.32 | -3.50 | -3.61 | -3.89 | -3.37 | -4.14 | -3.51 | -4.04  | -4.08  |
| <b>His204</b> | -0.92 | -0.93 | -0.77 | 0.21  | -0.72 | -0.75 | -1.14 | -1.09 | -0.10 | -1.18 | -0.54 | -0.61  | -0.41  |
| <b>Asn205</b> | -4.35 | -3.96 | -5.14 | -5.60 | -2.89 | -5.37 | -5.10 | -5.44 | -5.56 | -5.13 | -5.43 | -5.27  | -5.66  |
| <b>Arg209</b> | -3.33 | -3.31 | -3.13 | -3.78 | -3.82 | -3.18 | -3.42 | -3.72 | -2.99 | -3.90 | -3.30 | -3.66  | -3.08  |
| <b>Met215</b> | -1.00 | -0.78 | -0.77 | -1.06 | -1.33 | -0.80 | -0.49 | -0.79 | -1.08 | -0.74 | -0.60 | -1.36  | -1.24  |
| <b>Gly216</b> | -1.5  | -1.51 | -1.48 | -1.63 | -1.53 | -1.38 | -1.33 | -1.65 | -1.54 | -1.40 | -0.97 | -1.48  | -1.61  |
| <b>Val217</b> | -1.78 | -1.54 | -1.81 | -1.62 | -2.24 | -1.31 | -1.52 | -1.60 | -1.67 | -1.09 | -1.04 | -1.69  | -1.69  |
| <b>Val218</b> | -2.27 | -2.28 | -2.30 | -3.79 | -3.08 | -2.16 | -3.06 | -2.91 | -3.64 | -1.88 | -2.24 | -3.64  | -3.28  |
| <b>His231</b> | -1.02 | -1.13 | -1.10 | -0.97 | -1.23 | -1.15 | -0.75 | -1.06 | -1.04 | -1.16 | -1.17 | -1.37  | -1.38  |
| <b>Cu2(A)</b> | -0.91 | -0.96 | -0.76 | -0.41 | -0.64 | -0.81 | -4.90 | -0.61 | -0.43 | -0.96 | -0.73 | -0.59  | -0.60  |
| <b>Cu2(B)</b> | -3.32 | -2.95 | -3.73 | -3.79 | -9.39 | -3.41 | -0.81 | -3.77 | -4.91 | -3.45 | -3.25 | -10.78 | -10.55 |

**Table S3.** Electrostatic (*ele*) interactions (in Kcal/mol) computed for all TYR systems.

| Residue       | 6a     | 6b     | 6c     | 6e     | 6f     | 6h     | 6i     | 6j     | 6l     | 6m     | 6n     | 6o     | 6p     |
|---------------|--------|--------|--------|--------|--------|--------|--------|--------|--------|--------|--------|--------|--------|
| <b>Phe197</b> | -0.03  | 0.18   | 0.01   | 0.06   | 0.03   | 0.17   | 0.14   | -0.14  | 0.06   | -0.15  | 0.27   | -0.10  | -0.01  |
| <b>Gly200</b> | -0.30  | 0.01   | -0.16  | 0.02   | 0.06   | 0.37   | 0.20   | -2.38  | -0.33  | -0.49  | -0.46  | -0.28  | -0.24  |
| <b>Pro201</b> | -0.18  | -0.02  | 0.01   | -0.20  | -0.05  | 0.06   | -0.03  | -0.36  | -0.12  | -0.30  | -0.31  | -0.18  | -0.22  |
| <b>His204</b> | 2.50   | 2.30   | 2.42   | 2.38   | 2.25   | 2.39   | 1.21   | 2.05   | 2.36   | 1.99   | 2.35   | 2.36   | 2.19   |
| <b>Asn205</b> | 0.43   | 0.78   | 0.52   | 0.68   | 1.17   | 0.79   | -0.50  | 0.20   | 0.30   | 0.09   | 0.30   | 0.57   | 0.34   |
| <b>Arg209</b> | -1.53  | -1.82  | -1.96  | -0.85  | -1.81  | -3.30  | 0.58   | 0.58   | -2.63  | 0.58   | -1.07  | -4.94  | -1.34  |
| <b>Met215</b> | -0.29  | -0.35  | -0.49  | -0.55  | -0.05  | -0.43  | -0.26  | -0.32  | -0.39  | -0.37  | -0.01  | -0.45  | -0.26  |
| <b>Gly216</b> | 0.40   | 0.07   | 0.44   | -0.36  | -0.12  | 0.05   | -0.47  | 0.05   | -0.07  | -0.45  | 0.01   | 0.04   | -0.14  |
| <b>Val217</b> | -0.30  | -0.35  | -0.60  | -0.32  | -0.42  | -0.45  | -0.46  | -0.16  | -0.49  | -0.11  | -0.06  | -0.63  | -0.52  |
| <b>Val218</b> | -0.15  | -0.04  | -0.18  | 0.06   | -0.26  | -0.12  | 0.13   | 0.02   | 0.05   | 0.09   | 0.09   | -0.15  | -0.03  |
| <b>His231</b> | 1.90   | 2.21   | 2.04   | 1.96   | 2.49   | 2.12   | 0.89   | 2.03   | 2.00   | 2.19   | 2.18   | 2.01   | 2.10   |
| <b>Cu2(A)</b> | -6.88  | -3.91  | -4.60  | -4.43  | -1.14  | -3.15  | -35.79 | -6.53  | -4.11  | -5.41  | -5.77  | -1.12  | -2.83  |
| <b>Cu2(B)</b> | -33.66 | -36.35 | -34.89 | -35.82 | -34.66 | -34.96 | -5.39  | -36.80 | -34.84 | -36.98 | -37.18 | -31.92 | -34.32 |
